# Supplementary material for: A novel long-wavelength fluorescent probe for selective detection of hydrogen sulfide in living cells
Source: Royal Society of Chemistry journal article supplement (doi:10.1039/c8nj04241a), 2018-01-01

## Supporting Information

### A Novel Long-wavelength Fluorescent Probe for Selective Detection of Hydrogen Sulfide in Living Cells

Yu-ting Li, Xiong-jie Zhao, Yu-ren Jiang\*, Bing-qing Yang

Department of Pharmaceutical Engineering, College of Chemistry and Chemical

Engineering, Central South University, Changsha 410083, China

\*Corresponding author. [jiangyr@mail.csu.edu.cn](mailto:jiangyr@mail.csu.edu.cn)

#### Table of Contents

|                                                                 |     |
|-----------------------------------------------------------------|-----|
| The pH stability of LC-OH .....                                 | 1 - |
| Mechanism study of LC-H <sub>2</sub> S to H <sub>2</sub> S..... | 1 - |
| <sup>1</sup> H-NMR Chart of LC-OH.....                          | 2 - |
| <sup>13</sup> C-NMR Chart of LC-OH .....                        | 3 - |
| LCMS Chart of LC-OH .....                                       | 3 - |
| <sup>1</sup> H-NMR Chart of LC-H <sub>2</sub> S .....           | 4 - |
| <sup>13</sup> C-NMR Chart of LC-H <sub>2</sub> S.....           | 5 - |
| LCMS Chart of LC-H <sub>2</sub> S.....                          | 5 - |

## The pH stability of LC-OH

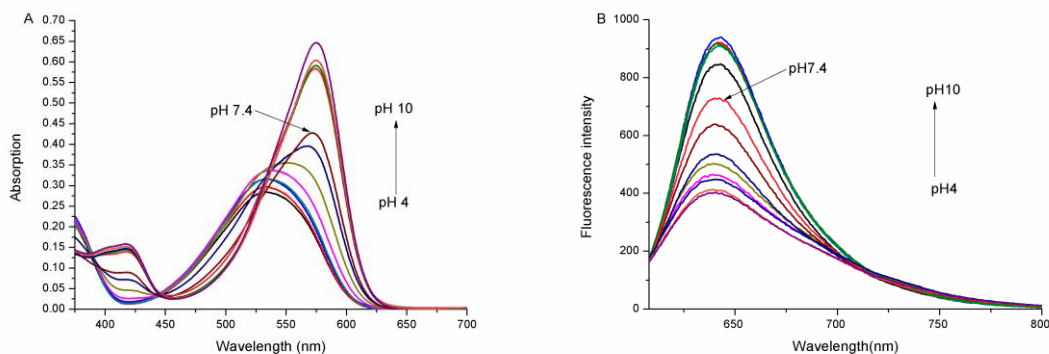

**Figure S1.** (A) UV absorption spectra of 10 μM LC-OH in PBS (10 mM, pH = 4-10, 1% DMSO). (B) Fluorescence emission spectra of 10 μM LC-OH in PBS (10 mM, pH = 4-10, 1% DMSO).

## Mechanism study of LC-H<sub>2</sub>S to H<sub>2</sub>S

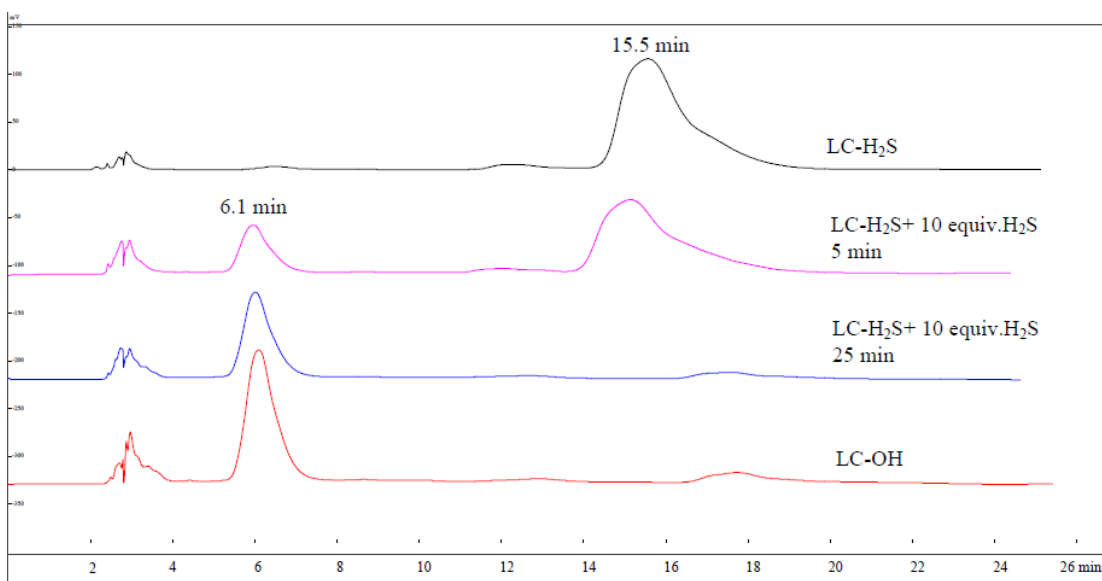

**Figure S2.** HPLC chromatograms: Black: LC-H<sub>2</sub>S; Pink: LC-H<sub>2</sub>S with 10 equiv. H<sub>2</sub>S measured after 5 min mixing; Blue: LC-H<sub>2</sub>S with 10 equiv. H<sub>2</sub>S measured after 25 min mixing; Red: LC-OH. The concentration of both LC-H<sub>2</sub>S and LC-OH are 10 μM. Condition: column, 5 μM C18, 250 × 4.6 mm;

eluent, MeOH/H<sub>2</sub>O (v/v, 7/3); flow rate, 1.0 mL/min; temperature, 25 °C; detection wavelength, 570 nm; injection volume, 5 µL.

### <sup>1</sup>H-NMR Chart of LC-OH

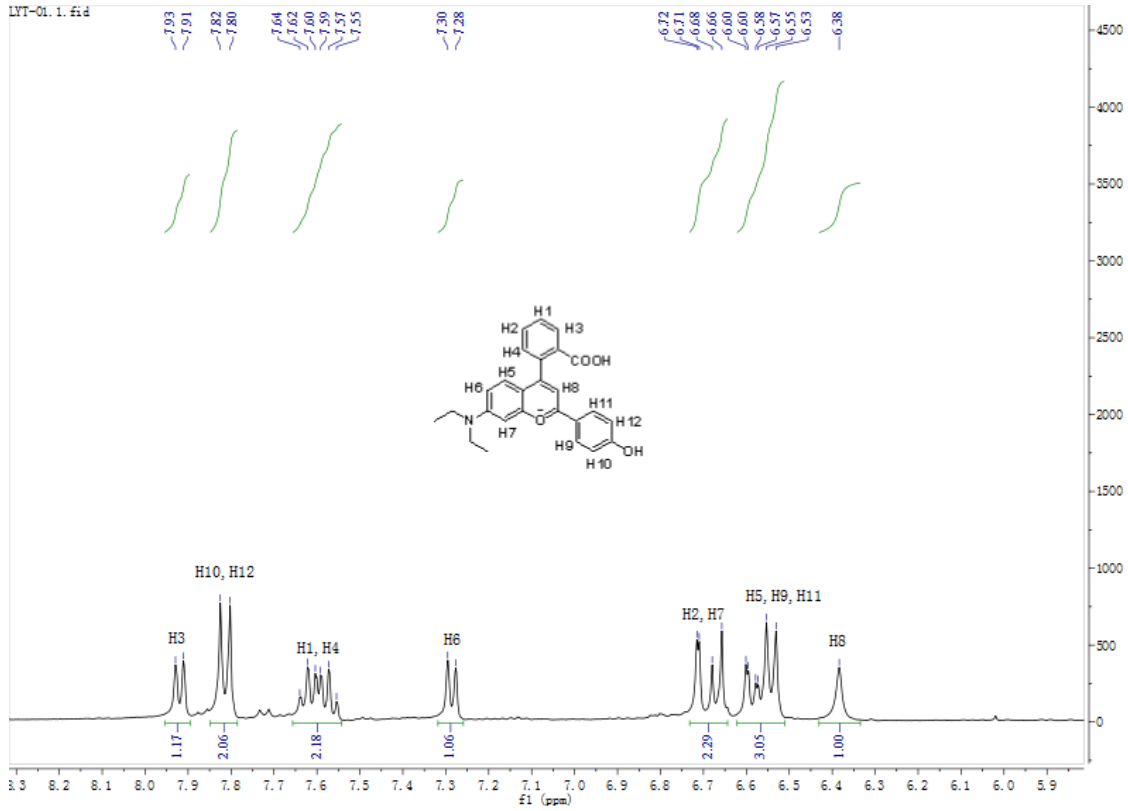

## <sup>13</sup>C-NMR Chart of LC-OH

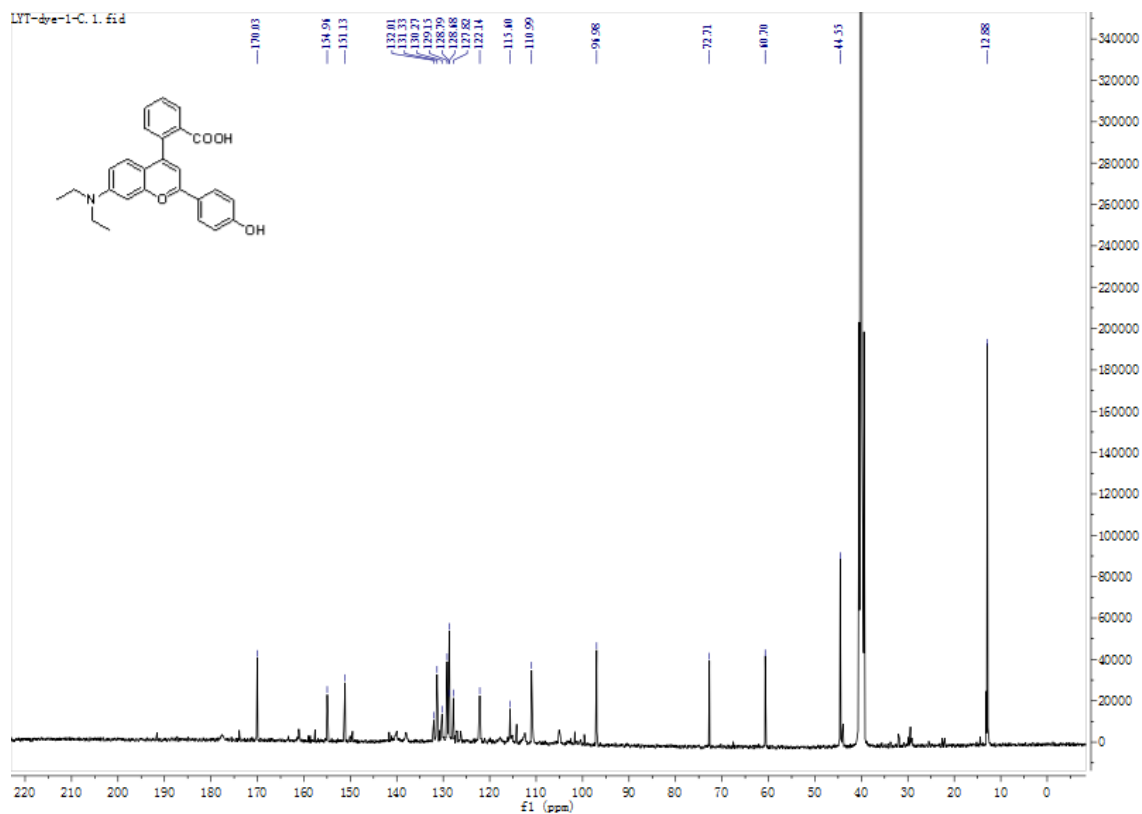

## LCMS Chart of LC-OH

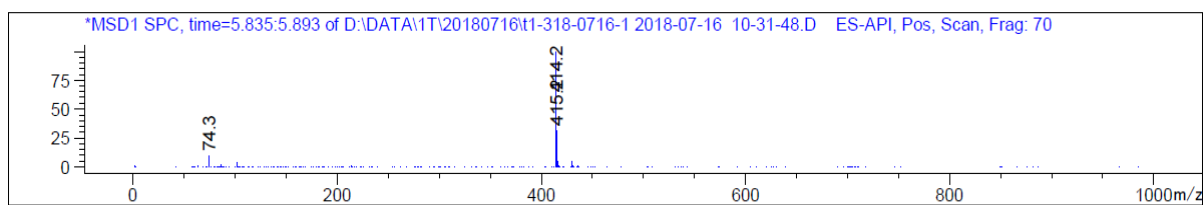

# <sup>1</sup>H-NMR Chart of LC-H<sub>2</sub>S

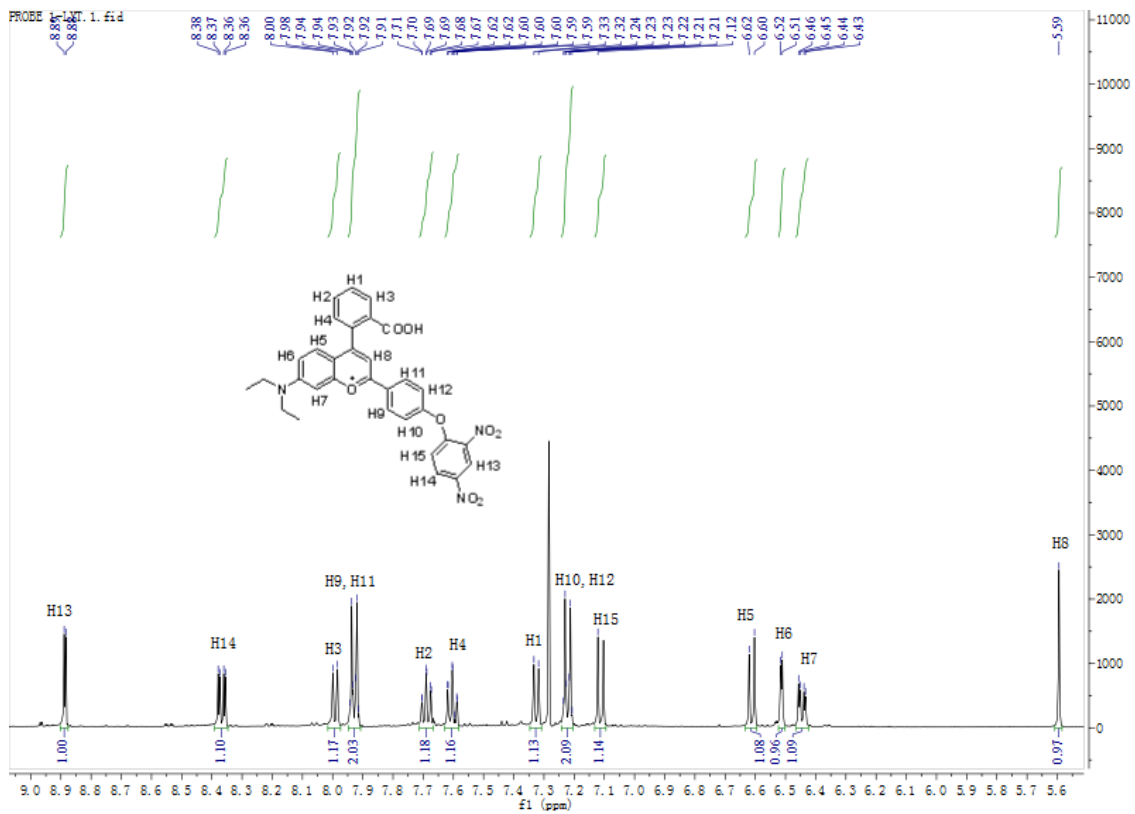

## <sup>13</sup>C-NMR Chart of LC-H<sub>2</sub>S

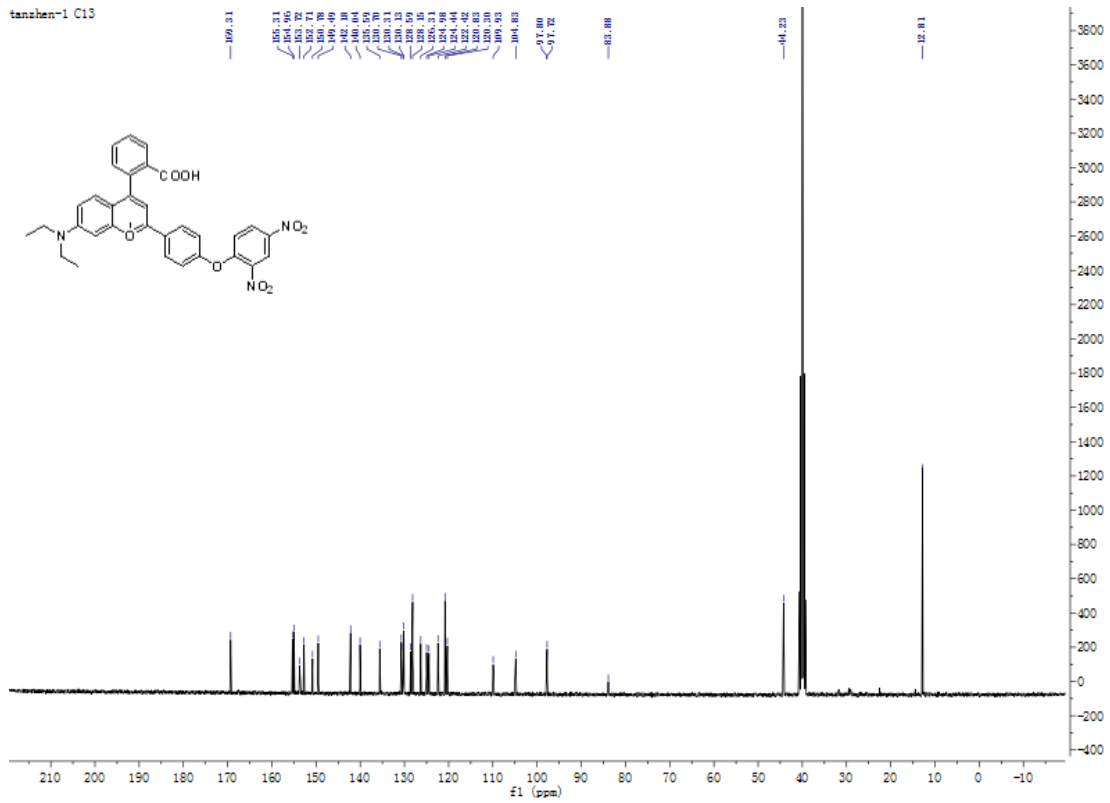

## LCMS Chart of LC-H<sub>2</sub>S

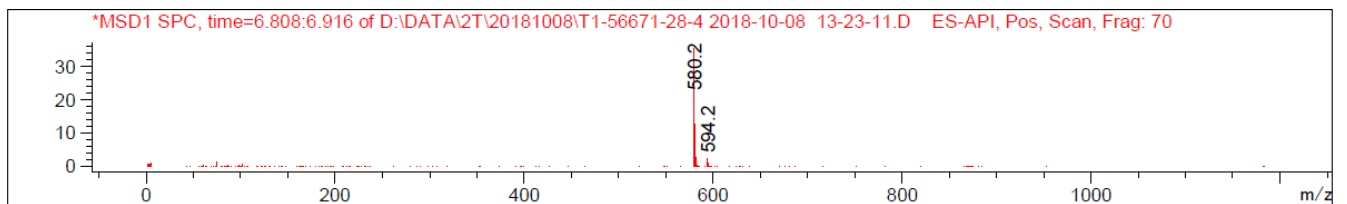

Supplement: c8nj04241a1.pdf [file c8nj04241a1.pdf]
